# Supplementary material for: Anti-Müllerian hormone (AMH) autocrine signaling promotes survival and proliferation of ovarian cancer cells
Source: PubMed Central journal article supplement (PMC7838181; doi:10.1038/s41598-021-81819-y), 2021-01-26

## Supplemental information

### Antibody characterization, original Western blot and Drawings

#### Anti-Müllerian hormone (AMH) autocrine signaling promotes survival and proliferation of ovarian cancer cells

Maëva Chauvin<sup>1,\*</sup>, Véronique Garambois<sup>1</sup>, Pierre-Emmanuel Colombo<sup>1,2</sup>, Myriam Chentouf<sup>1</sup>, Laurent Gros<sup>1</sup>, Jean-Paul Brouillet<sup>1,3</sup>, Bruno Robert<sup>1</sup>, Marta Jarlier<sup>1</sup>, Karen Dumas<sup>4</sup>, Pierre Martineau<sup>1</sup>, Isabelle Navarro-Teulon<sup>1</sup>, David Pépin<sup>5,6</sup>,  
Thierry Chardès<sup>1</sup>, André Pèlerin<sup>1,✉</sup>

<sup>1</sup>IRCM, Institut de Recherche en Cancérologie de Montpellier, Montpellier, F-34298, France; INSERM, U1194, Montpellier, F-34298, France; Université Montpellier, Montpellier, F-34298, France; Institut régional du Cancer de Montpellier, ICM, Montpellier, F-34298, France;

<sup>2</sup>Institut régional du Cancer de Montpellier, ICM, Montpellier, F-34298, France;

<sup>3</sup>Département de Biochimie et Biologie Moléculaire, CHU de Nîmes, Nîmes, France;

<sup>4</sup>SurgiMAB, 10 Parc Club du Millénaire, 1025 Avenue Henri Becquerel, 34000 Montpellier, France

<sup>5</sup>Department of Surgery, Harvard Medical School, Boston, MA, USA

<sup>6</sup>Pediatric Surgical Research Laboratories, Massachusetts General Hospital, Boston, MA, USA

✉Corresponding author at: Institut de Recherche en Cancérologie de Montpellier, Campus Val d'Aurelle, 34298 Montpellier Cedex, France; Tel: +33.4.67.61.30.32; FAX: +33.4.67.61.37.87; Email address: André Pèlerin, [andre.pelegrin@inserm.fr](mailto:andre.pelegrin@inserm.fr)

\*Present address: Pediatric Surgical Research Laboratories, Massachusetts General Hospital, Boston, MA, USA

## S1 : B10 characterization

a

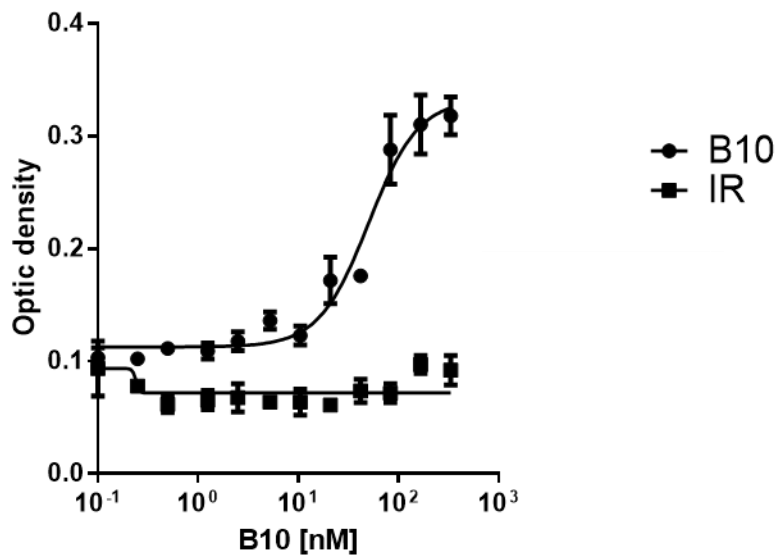

b

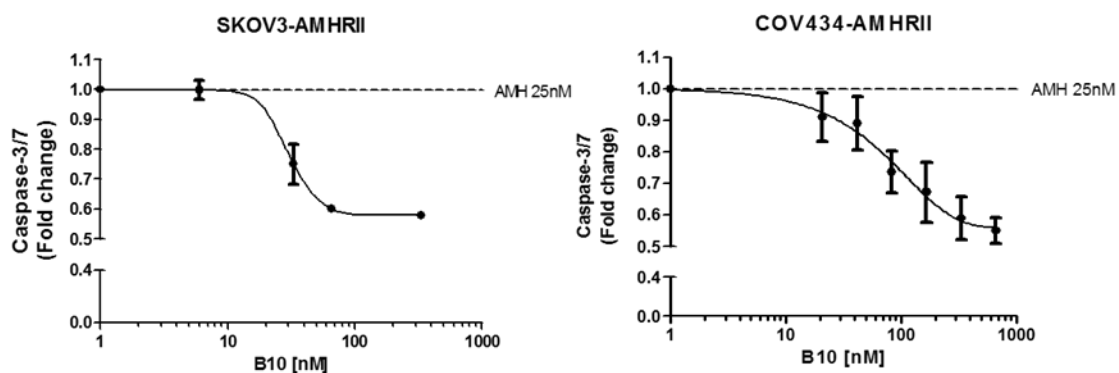

**Figure S1. Characterization of the B10 anti-AMH monoclonal antibody.** (A) For ELISA assays, plates were coated with an anti-AMH polyclonal antibody (Abcam Cat# ab84952) to capture AMH, and B10 was added at different concentrations to determine its EC<sub>50</sub> (50.4±1.2 nM). IR, irrelevant antibody 13R4. (B) B10 inhibits apoptosis induced by incubation with 25 nM LR-AMH in COV434-AMHR11 and SKO3-AMHR11 cells.

## S2 : AMH concentration in cell culture supernatants

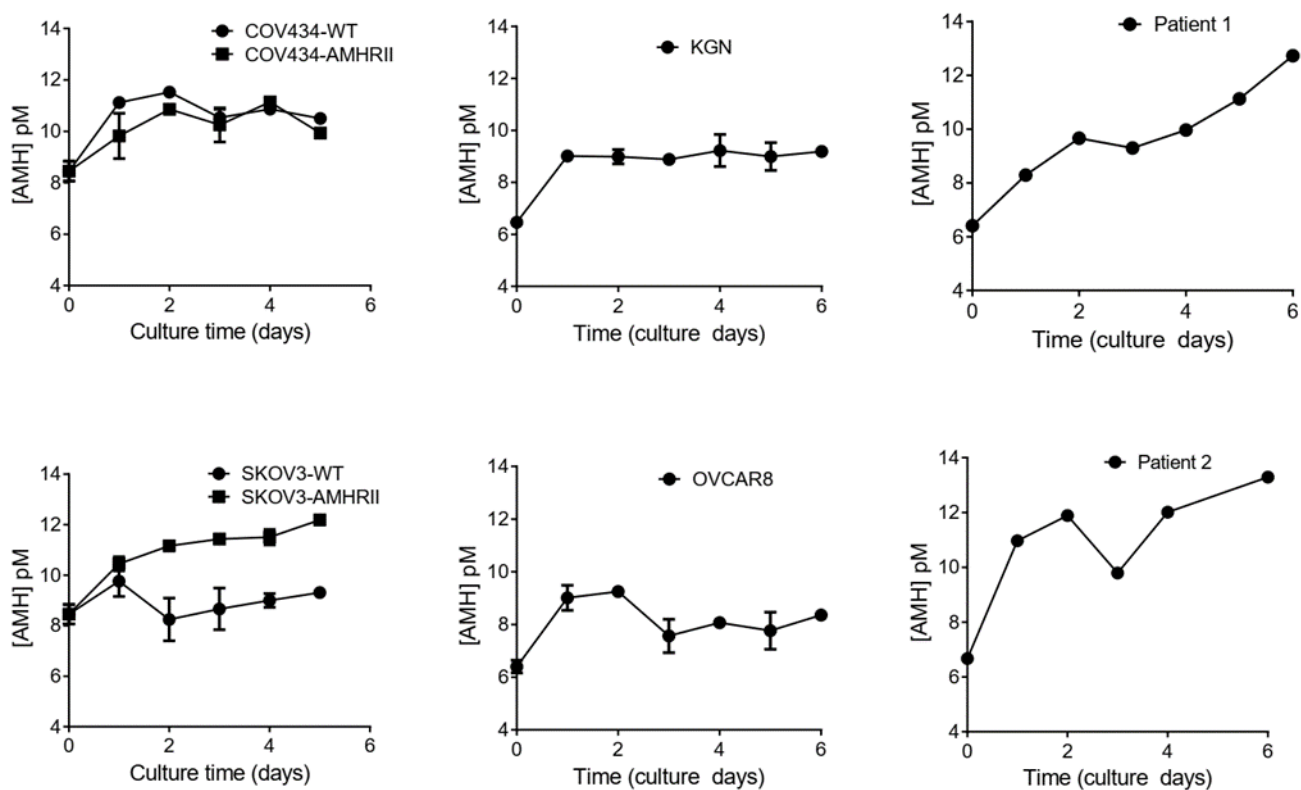

**Figure 2. AMH concentration in basal cell cultures.** All experiments involving LR-AMH were performed in culture medium containing 1% FBS in which AMH concentration ranged from 6 to 9 pM in fresh medium to about 10 to 15 pM after 5 days of cell culture. For all cell lines, graphs represent two independent experiments (mean±range)

# S3 : Original Western Blot

Figure 1\_panel b

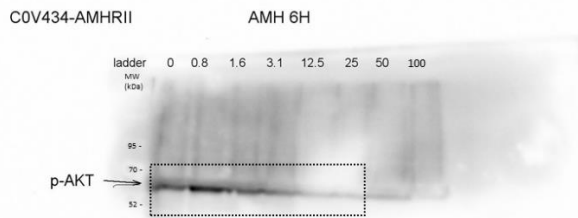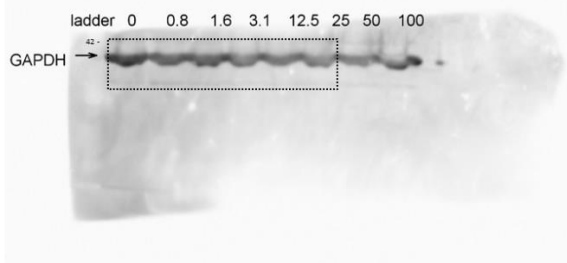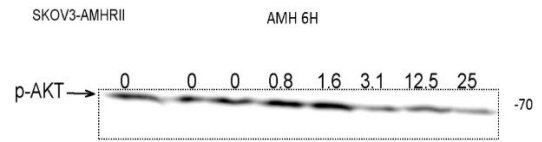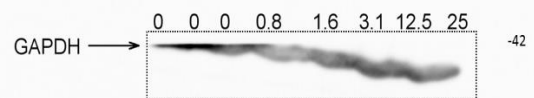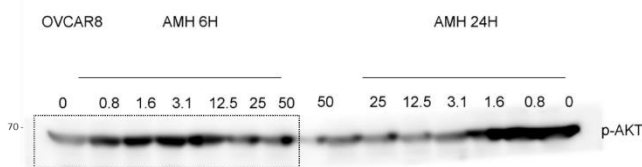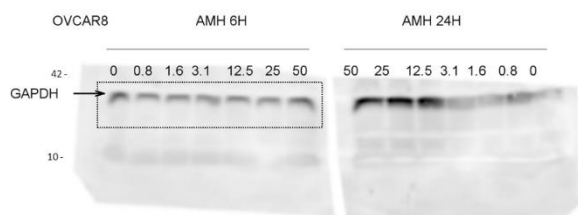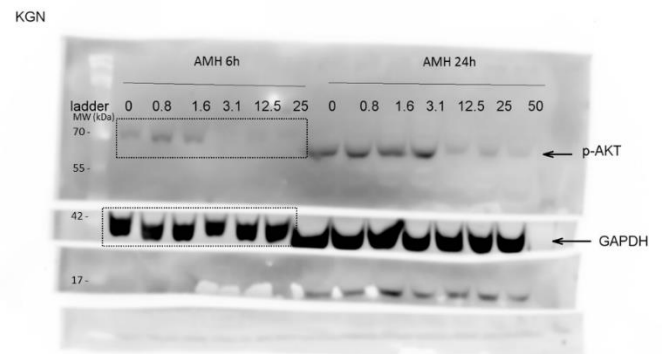

Figure 1\_Panel c

COV434-AMHR11

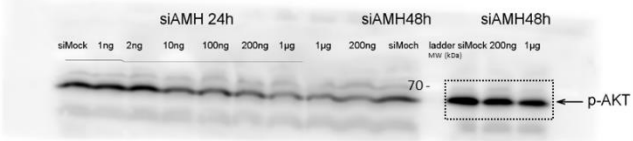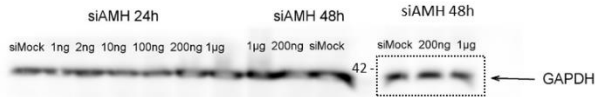

COV434-AMHR11

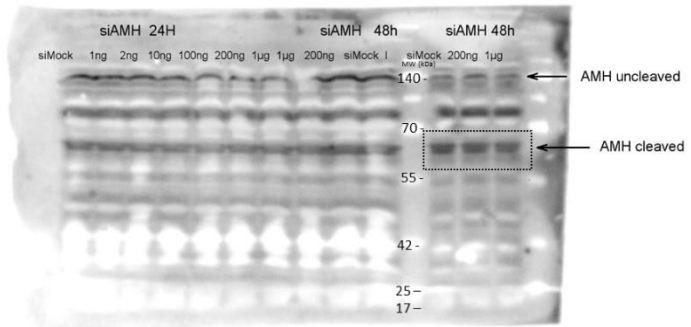

SKOV3-AMHR11

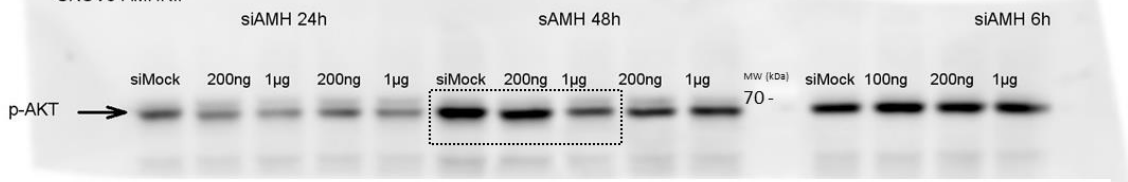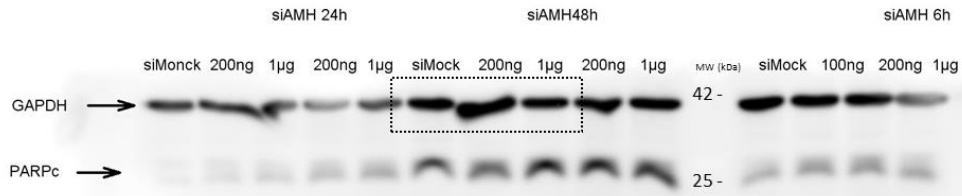

SKOV3-AMHR11

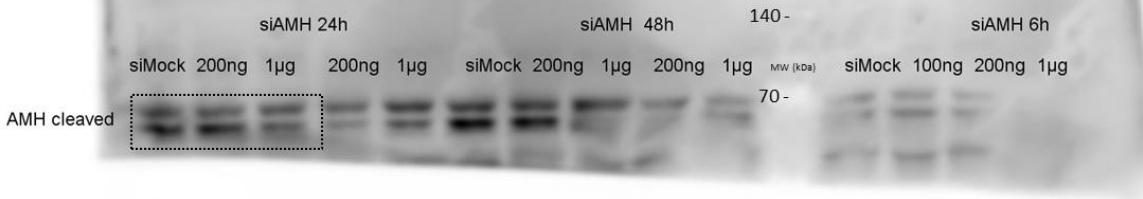

OVCAR8

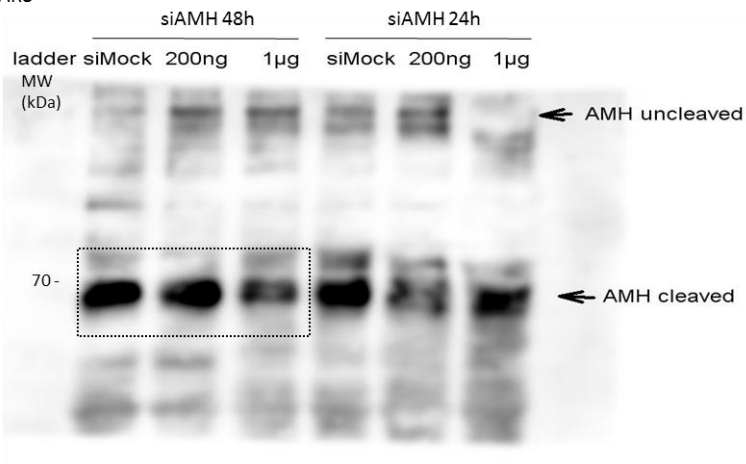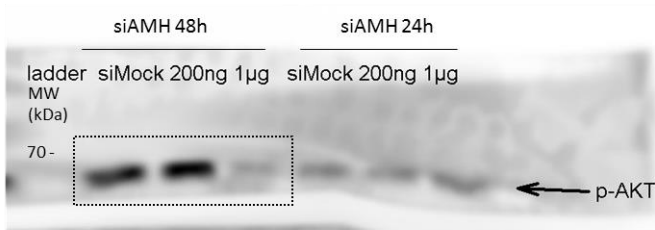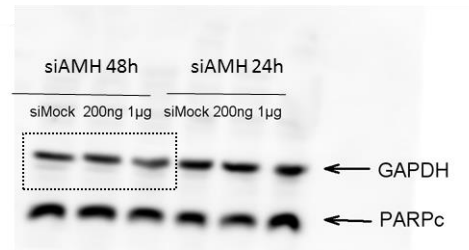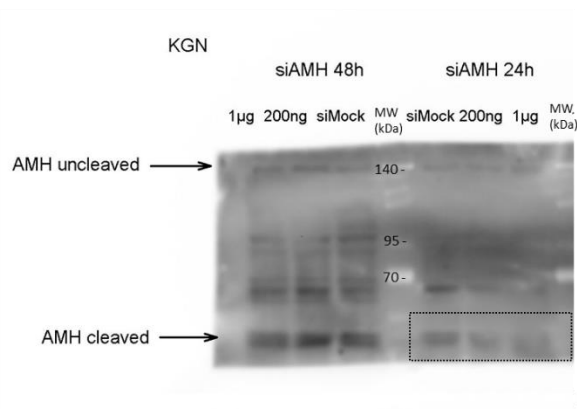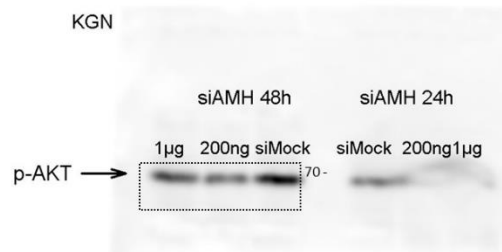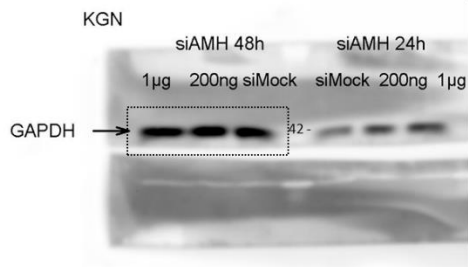

Figure 2\_Panel c

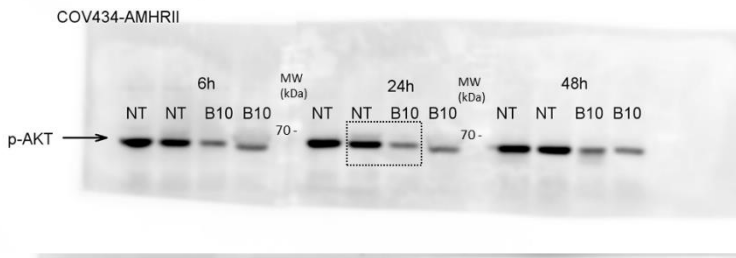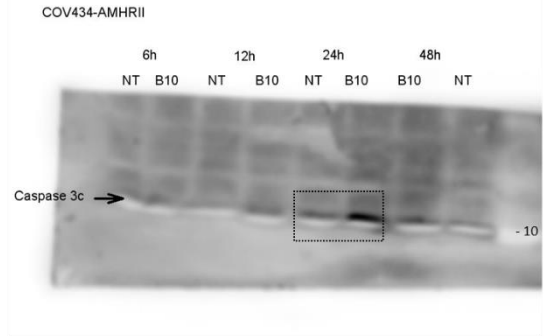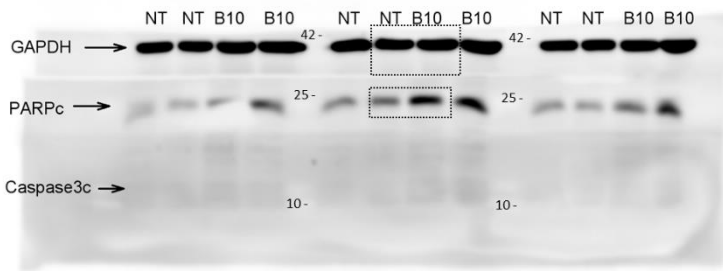

SKOV3-AMHR11

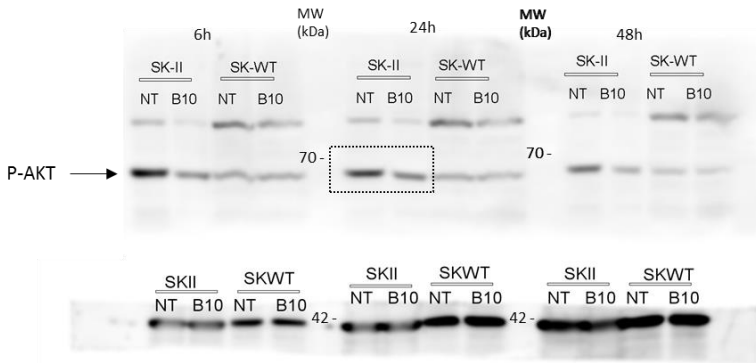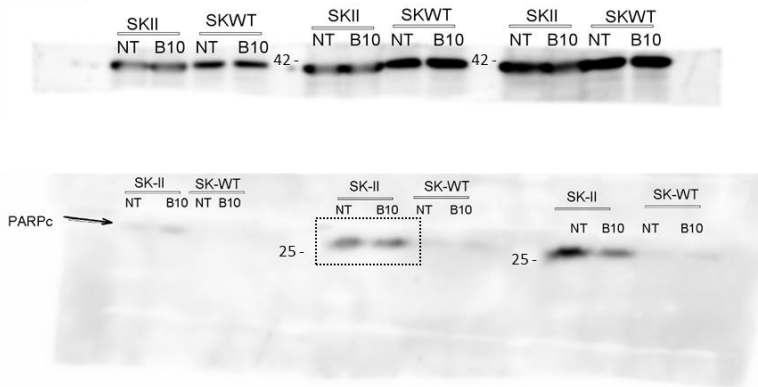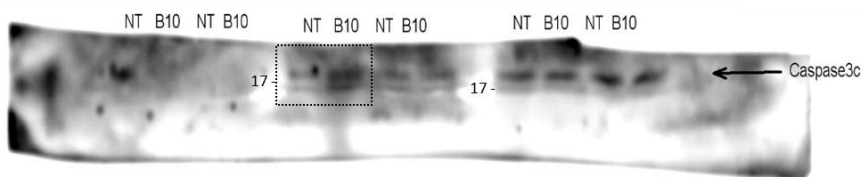

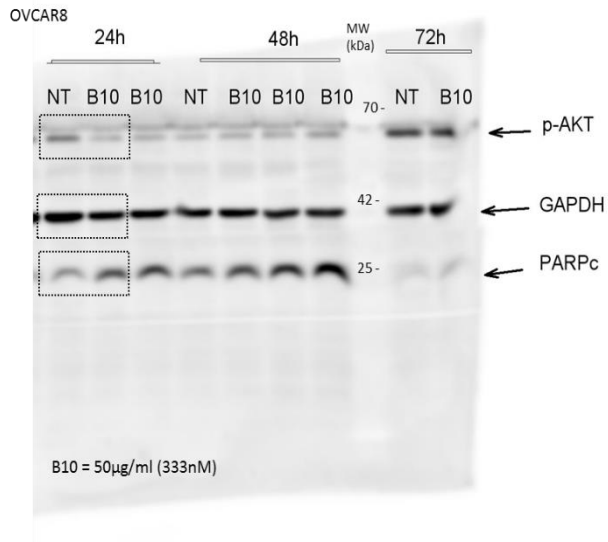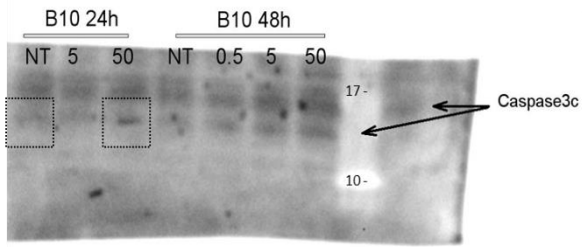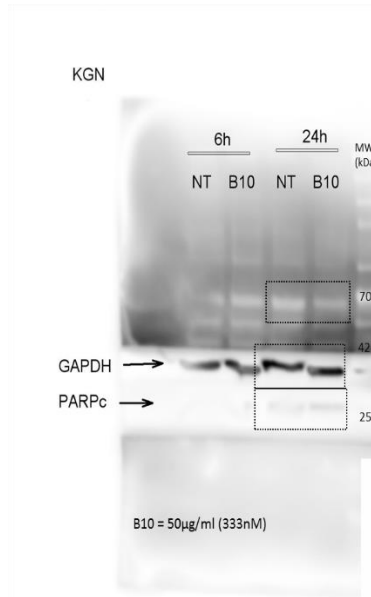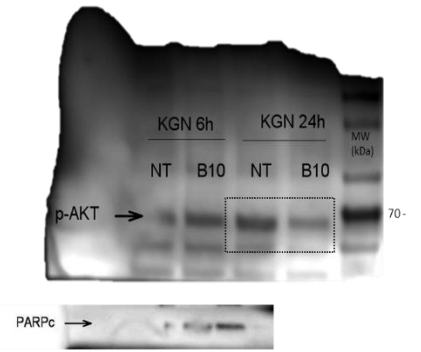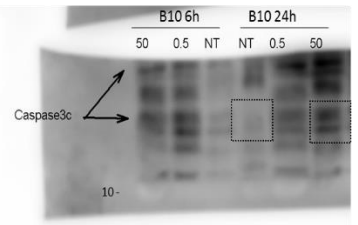

Supplement: 41598_2021_81819_MOESM1_ESM.pdf [file 41598_2021_81819_MOESM1_ESM.pdf]
